# Supplementary material
Source: MDPI journal article supplement (https://www.mdpi.com/2076-3298/8/12/136)
Supplement: s1 [file s1]

Table S5. Biomass production ( $\text{g L}^{-1}$ ), maximum specific growth rate ( $\text{d}^{-1}$ ), productivities and bioremediation expressed as removal of COD, N and P in the cultivation of microalgae on urban wastewater (not specified).

| Type of water    | Condition s | Microalgae/Microalgae in symbiosis | Biomass production | Unit                 | Maximum specific growth rate | Time Unit       | Bioremediation removal % |     | Reference                  |
|------------------|-------------|------------------------------------|--------------------|----------------------|------------------------------|-----------------|--------------------------|-----|----------------------------|
|                  |             |                                    |                    |                      |                              |                 | N                        | P   |                            |
| Urban Wastewater | 40d batch   | <i>Ankistrodesmus falcatus</i>     | 2.187              | $\text{g SS L}^{-1}$ | 0.10                         | $\text{d}^{-1}$ | 89                       |     | Mennaa F.Z. et al., (2015) |
| Urban Wastewater | 40d batch   | <i>Scenedesmus obliquus</i>        | 1.635              | $\text{g SS L}^{-1}$ | 0.28                         | $\text{d}^{-1}$ | 89                       |     |                            |
| Urban Wastewater | 40d batch   | <i>Chlorella kessleri</i>          | 0.932              | $\text{g SS L}^{-1}$ | 0.44                         | $\text{d}^{-1}$ | 87                       | 85  |                            |
| Urban Wastewater | 40d batch   | <i>Chlorella vulgaris</i>          | 1.236              | $\text{g SS L}^{-1}$ | 0.38                         | $\text{d}^{-1}$ | 92                       | 88  |                            |
| Urban Wastewater | 40d batch   | <i>Chlorella sorokiniana</i>       | 1.045              | $\text{g SS L}^{-1}$ | 0.37                         | $\text{d}^{-1}$ | 100                      | 81  |                            |
| Urban Wastewater | 40d batch   | <i>Botryococcus braunii</i>        | 0.930              | $\text{g SS L}^{-1}$ | 0.42                         | $\text{d}^{-1}$ | 100                      | 82  |                            |
| Urban Wastewater | 40d batch   | <i>Neochloris oleabundans</i>      | 0.792              | $\text{g SS L}^{-1}$ | 0.24                         | $\text{d}^{-1}$ | 92                       | 79  |                            |
| Urban Wastewater | 40d batch   | <i>Natural bloom</i>               | 1.019              | $\text{g SS L}^{-1}$ | 0.52                         | $\text{d}^{-1}$ | 96                       | 91  |                            |
| Urban Wastewater | 360h batch  | <i>Chlorella stigmatophora</i>     | 1.148 $\pm$ 0.041  | $\text{g SS L}^{-1}$ | 1.008 $\pm$ 0.096            | $\text{d}^{-1}$ | >90                      | >90 | Arbib Z. et al., (2012)    |
