# Supplementary material
Source: MDPI journal article supplement (https://www.mdpi.com/2076-3298/8/12/136)
Supplement: s1 [file s1]

Table S4. Biomass production ( $\text{g L}^{-1}$ ), maximum specific growth rate ( $\text{d}^{-1}$ ), productivities ( $\text{g L}^{-1} \text{d}^{-1}$ ) and bioremediation expressed as removal of COD, N and P in the cultivation of microalgae on wastewater with other substrates.

| Type of water                    | Conditions                                                 | Microalgae/Microalgae in symbiosis | Biomass production | Unit              | Maximum specific growth rate | Time Unit | Productivities      | Unit                            | Bioremediation removal % |                |                | Reference                      |
|----------------------------------|------------------------------------------------------------|------------------------------------|--------------------|-------------------|------------------------------|-----------|---------------------|---------------------------------|--------------------------|----------------|----------------|--------------------------------|
|                                  |                                                            |                                    |                    |                   |                              |           |                     |                                 | COD                      | N              | P              |                                |
| Wastewater with other substrates | 35d batch centrate 100%                                    | <i>Chlorella fusca</i>             | 3.5                | $\text{g L}^{-1}$ |                              |           |                     |                                 |                          | 100            | 48             | Peralta et al., (2019)         |
| Wastewater with other substrates | 35d batch centrate 66%                                     | <i>Chlorella fusca</i>             | 2.5                | $\text{g L}^{-1}$ |                              |           |                     |                                 |                          | 100            | 75             |                                |
| Wastewater with other substrates | 21d batch centrate 33%                                     | <i>Chlorella fusca</i>             | 2                  | $\text{g L}^{-1}$ |                              |           |                     |                                 |                          | 100            | 53             |                                |
| Wastewater with other substrates | 8d UWW with gly Mixotrophic                                | <i>Chlorella</i>                   | 1.29               | $\text{g L}^{-1}$ |                              |           |                     |                                 |                          | 89             | 96             | Nzayisenga J.C. et al., (2018) |
| Wastewater with other substrates | 8d UWW with glu Mixotrophic                                | <i>Chlorella</i>                   | 1.17               | $\text{g L}^{-1}$ |                              |           |                     |                                 |                          | 88             | 96             |                                |
| Wastewater with other substrates | 8d UWW Autotrophic                                         | <i>Chlorella</i>                   | 1.12               | $\text{g L}^{-1}$ |                              |           |                     |                                 |                          | 83             | 96             |                                |
| Wastewater with other substrates | 8d UWW with gly Eterotrophic                               | <i>Chlorella</i>                   | 0.5                | $\text{g L}^{-1}$ |                              |           |                     |                                 |                          | 76             | 96             |                                |
| Wastewater with other substrates | 8d UWW with glu Eterotrophic                               | <i>Chlorella</i>                   | 0.6                | $\text{g L}^{-1}$ |                              |           |                     |                                 |                          | 78             | 96             |                                |
| Wastewater with other substrates | 14d digestate ADMW                                         | <i>Scenedesmus acuminatus</i>      | 2.9                | $\text{g L}^{-1}$ |                              |           |                     |                                 | 48                       | 44             | >96.9          | Tao et al., (2017)             |
| Wastewater with other substrates | 14d digestate ADMW                                         | <i>Chlorella vulgaris</i>          | 2                  | $\text{g L}^{-1}$ |                              |           |                     |                                 | 55                       | 24             | >96.9          |                                |
| Wastewater with other substrates | 10d Effluents (ADEs) 160 $\text{mg N - NH}_4^+ / \text{L}$ | <i>Chlorella sp</i>                | 2.3                | $\text{g L}^{-1}$ |                              |           | $0.3865 \pm 0.0241$ | $\text{g L}^{-1} \text{d}^{-1}$ | $36.2 \pm 4.9$           | $98.6 \pm 1.4$ | $77.8 \pm 3.1$ | Zieliński M. et al., (2018)    |
| Wastewater with other substrates | 5d effluent after AnMBBR                                   | <i>Chlorella/Scenedesmus</i>       | 0.53               | $\text{g L}^{-1}$ |                              |           |                     |                                 | 57                       | 93             | 99             | Hultberg et al., (2016)        |

|                                  |                                                             |                                |           |                       |      |                 |               |                                                |  |      |      |                           |
|----------------------------------|-------------------------------------------------------------|--------------------------------|-----------|-----------------------|------|-----------------|---------------|------------------------------------------------|--|------|------|---------------------------|
| Wastewater with other substrates | 14d 70% MW + 30% Seawater                                   | <i>Nannochloropsis oculata</i> | 0.345     | g L <sup>-1</sup>     | 0.42 | d <sup>-1</sup> |               |                                                |  | 74±5 | 84±3 | Şirin & Sillanpää. (2015) |
| Wastewater with other substrates | 14d 100% MW                                                 | <i>Nannochloropsis oculata</i> | 0.369     | g L <sup>-1</sup>     | 0.45 | d <sup>-1</sup> |               |                                                |  | 77±2 | 90±3 |                           |
| Wastewater with other substrates | 11d primary wastewater diluted with centrate 130 mg N / L   | <i>Chlorella kessleri</i>      | 2.70±0.08 | g L <sup>-1</sup>     |      |                 |               |                                                |  | 96   | 99   | Caporgno et al., (2015)   |
| Wastewater with other substrates | 11d primary wastewater diluted with centrate 130 mg N/L     | <i>Chlorella vulgaris</i>      | 2.91±0.02 | g L <sup>-1</sup>     |      |                 |               |                                                |  | 95   | 98   |                           |
| Wastewater with other substrates | 14d sea water diluted with centrate 100 mg N/L 25‰ salinity | <i>Nannochloropsis oculata</i> | 1.05±0.06 | g L <sup>-1</sup>     |      |                 |               |                                                |  | 47   | 96   |                           |
| Wastewater with other substrates | 20d Uww with agricultura runoff                             | <i>Microalgae-Bacteria</i>     | 0.320     | g VSS L <sup>-1</sup> |      |                 | 2200 (3 PBRs) | g VSS L <sup>-1</sup> d <sup>-1</sup> (3 PBRs) |  | 99   | 99   | Uggetti et al., (2018)    |
