# Supplementary material
Source: MDPI journal article supplement (https://www.mdpi.com/2076-3298/8/12/136)
Supplement: s1 [file s1]

Table S2. Biomass production ( $\text{g L}^{-1}$ ), maximum specific growth rate ( $\text{d}^{-1}$ ), productivities ( $\text{g L}^{-1} \text{d}^{-1}$  or  $\text{g m}^{-2} \text{d}^{-1}$ ) and bioremediation expressed as removal of COD, N and P in the cultivation of microalgae on primary wastewater.

| Type of water      | Conditions                                | Microalgae/Microalgae in symbiosis               | Biomass production | Unit                  | Maximum specific growth rate | Time Unit       | Productivities    | Unit                                | Bioremediation removal % |             |             | Reference                     |
|--------------------|-------------------------------------------|--------------------------------------------------|--------------------|-----------------------|------------------------------|-----------------|-------------------|-------------------------------------|--------------------------|-------------|-------------|-------------------------------|
|                    |                                           |                                                  |                    |                       |                              |                 |                   |                                     | COD                      | N           | P           |                               |
| Primary wastewater | 14d 10% BAS                               | <i>Nannochloropsis oculata</i>                   | 0.337              | $\text{g L}^{-1}$     | 0.41                         | $\text{d}^{-1}$ |                   |                                     |                          | $82 \pm 2$  | $80 \pm 3$  | Şirin et al., (2015)          |
| Primary wastewater | 14d 20% BAS                               | <i>Nannochloropsis oculata</i>                   | 0.406              | $\text{g L}^{-1}$     | 0.37                         | $\text{d}^{-1}$ |                   |                                     |                          | $86 \pm 3$  | $81 \pm 2$  |                               |
| Primary wastewater | 260d HRAP-PT                              | <i>Chlorella</i>                                 |                    |                       |                              |                 | $15 \pm 6$        | $\text{g VSS m}^{-2} \text{d}^{-1}$ | $62 \pm 22$              | $49 \pm 17$ | $37 \pm 52$ | Arashiro L.T. et al., (2019)  |
| Primary wastewater | 13d batch                                 | <i>Chlorella saccharophila</i>                   | $0.80 \pm 0.08$    | $\text{g L}^{-1}$     | $1.15 \pm 0.17$              | $\text{d}^{-1}$ |                   |                                     |                          | 92-97       | 100         | Ferro et al., (2018)          |
| Primary wastewater | 13d batch                                 | <i>Chlorella sorokiniana</i>                     | $0.90 \pm 0.12$    | $\text{g L}^{-1}$     | $1.08 \pm 0.16$              | $\text{d}^{-1}$ |                   |                                     |                          | 92-97       | 100         |                               |
| Primary wastewater | 13d batch                                 | <i>Chlorella vulgaris</i>                        | $1.15 \pm 0.06$    | $\text{g L}^{-1}$     | $1.06 \pm 0.09$              | $\text{d}^{-1}$ |                   |                                     |                          | 92-97       | 100         |                               |
| Primary wastewater | 13d batch                                 | <i>Coelastrella sp</i>                           | $1.46 \pm 0.16$    | $\text{g L}^{-1}$     | $0.58 \pm 0.21$              | $\text{d}^{-1}$ |                   |                                     |                          | 92-97       | 100         |                               |
| Primary wastewater | 13d batch                                 | <i>Desmodesmus sp. (RUC-2)</i>                   | $0.87 \pm 0.8$     | $\text{g L}^{-1}$     | $1.18 \pm 0.11$              | $\text{d}^{-1}$ |                   |                                     |                          | 92-97       | 100         |                               |
| Primary wastewater | 13d batch                                 | <i>Desmodesmus sp (2-6)</i>                      | $0.99 \pm 0.10$    | $\text{g L}^{-1}$     | $1.08 \pm 0.04$              | $\text{d}^{-1}$ |                   |                                     |                          | 92-97       | 100         |                               |
| Primary wastewater | 13d batch                                 | <i>Scenedesmus sp.</i>                           | $1.24 \pm 0.04$    | $\text{g L}^{-1}$     | $0.90 \pm 0.16$              | $\text{d}^{-1}$ |                   |                                     |                          | 92-97       | 100         |                               |
| Primary wastewater | 13d batch                                 | <i>Scenedesmus obliquus</i>                      | $1.36 \pm 0.27$    | $\text{g L}^{-1}$     | $0.90 \pm 0.04$              | $\text{d}^{-1}$ |                   |                                     |                          | 92-97       | 100         |                               |
| Primary wastewater | 11d Semi-continuous                       | <i>Chlorella vulgaris</i>                        | $0.42 \pm 0.07$    | $\text{g VSS L}^{-1}$ |                              |                 |                   |                                     | 34-45                    | 92          | 94          | Mendez L. et al., (2016)      |
| Primary wastewater | 11d Semi-continuous                       | <i>Aphanizomenon ovalisporum (Cyanobacteria)</i> | 0.5                | $\text{g VSS L}^{-1}$ |                              |                 |                   |                                     | 34-45                    | 95          | 68          |                               |
| Primary wastewater | 11d Semi-continuous                       | <i>Anabaena planctonica (Cyanobacteria)</i>      | 0.71               | $\text{g VSS L}^{-1}$ |                              |                 |                   |                                     | 35-45                    | 93          | 84          |                               |
| Primary wastewater | 15 d batch Pre-nitrification process      | <i>Tetraselmis sp. CTP4</i>                      |                    |                       | $0.27 \pm 0.02$              | $\text{d}^{-1}$ | 0.099             | $\text{g VSS L}^{-1} \text{d}^{-1}$ |                          | 84          |             | Schulze P.S.C. et al., (2017) |
| Primary wastewater | 15 d batch Post-nitrification process     | <i>Tetraselmis sp. CTP4</i>                      |                    |                       | $0.27 \pm 0.02$              | $\text{d}^{-1}$ | 0.110             | $\text{g VSS L}^{-1} \text{d}^{-1}$ |                          | 94          |             |                               |
| Primary wastewater | 15 d continuous Pre-nitrification process | <i>Tetraselmis sp. CTP4</i>                      |                    |                       | $0.41 \pm 0.01$              | $\text{d}^{-1}$ | $0.335 \pm 0.060$ | $\text{g VSS L}^{-1} \text{d}^{-1}$ |                          |             |             |                               |

|                    |                                            |                              |            |                       |           |                 |             |                                       |       |       |     |                              |
|--------------------|--------------------------------------------|------------------------------|------------|-----------------------|-----------|-----------------|-------------|---------------------------------------|-------|-------|-----|------------------------------|
| Primary wastewater | 15 d continuous Post-nitrification process | <i>Tetraselmis sp. CTP4</i>  |            |                       | 0.49±0.02 | d <sup>-1</sup> | 0.351±0.057 | g VSS L <sup>-1</sup> d <sup>-1</sup> |       |       |     |                              |
| Primary wastewater | 5d before AnMBBR                           | <i>Chlorella/Scenedesmus</i> | 0.57±0.062 | g L <sup>-1</sup>     |           |                 |             |                                       | 23    | 94    | 99  | Hultberg et al., (2016)      |
| Primary wastewater | 19d M100 (100% wastewater)                 | <i>Chlorella/Scenedesmus</i> | 2.75       | g L <sup>-1</sup>     |           |                 |             |                                       |       | 93    | 100 | Koreiviene J. et al., (2014) |
| Primary wastewater | 19d M75 (75% wastewater)                   | <i>Chlorella/Scenedesmus</i> | 3.04       | g L <sup>-1</sup>     |           |                 |             |                                       |       | 96    | 100 |                              |
| Primary wastewater | 19d M50 (50% wastewater)                   | <i>Chlorella/Scenedesmus</i> | 2.1        | g L <sup>-1</sup>     |           |                 |             |                                       |       | 96    | 100 |                              |
| Primary wastewater | 19d M25 (25% wastewater)                   | <i>Chlorella/Scenedesmus</i> | 1.8        | g L <sup>-1</sup>     |           |                 |             |                                       |       | 89    | 100 |                              |
| Primary wastewater | 7d Semi-continuous HRT 1,5                 | <i>Desmodesmus communis</i>  | 0.20±0.01  | g VSS L <sup>-1</sup> |           |                 | 0.14        | g VSS L <sup>-1</sup> d <sup>-1</sup> |       | 47    | >99 | Samorì G. et al., (2014)     |
| Primary wastewater | 7d Semi-continuous HRT 3                   | <i>Desmodesmus communis</i>  | 0.44±0.03  | g VSS L <sup>-1</sup> |           |                 | 0.14        | g VSS L <sup>-1</sup> d <sup>-1</sup> |       | 99    | >99 |                              |
| Primary wastewater | 7d Semi-continuous HRT 5                   | <i>Desmodesmus communis</i>  | 0.74±0.02  | g VSS L <sup>-1</sup> |           |                 | 0.14        | g VSS L <sup>-1</sup> d <sup>-1</sup> |       | >99   | >99 |                              |
| Primary wastewater | 365d continuous                            | <i>Microalgae</i>            |            |                       |           |                 | 10          | g TSS m <sup>-2</sup> d <sup>-1</sup> | 60-92 | 94-99 |     | Passos et al., (2015)        |
