# Supplementary material
Source: MDPI journal article supplement (https://www.mdpi.com/2076-3298/8/12/136)
Supplement: s1 [file s1]

Table S1. Biomass production ( $\text{g L}^{-1}$ ), maximum specific growth rate ( $\text{d}^{-1}$  or  $\text{h}^{-1}$ ), productivities ( $\text{g L}^{-1} \text{d}^{-1}$  or  $\text{g m}^{-2} \text{d}^{-1}$ ) and bioremediation expressed as removal of COD, N and P in the cultivation of microalgae on raw wastewater.

| Type of water                  | Conditions                        | Microalgae/Microalgae in symbiosis                | Biomass production | Unit              | Maximum specific growth rate                   | Time Unit       | Productivities | Unit | Bioremediation removal % |                 |     | Reference                |
|--------------------------------|-----------------------------------|---------------------------------------------------|--------------------|-------------------|------------------------------------------------|-----------------|----------------|------|--------------------------|-----------------|-----|--------------------------|
|                                |                                   |                                                   |                    |                   |                                                |                 |                |      | COD                      | N               | P   |                          |
| Raw wastewater                 | 7d autotrophic batch              | <i>Chlorella sorokiniana</i>                      | 0.169              | $\text{g L}^{-1}$ |                                                |                 |                |      | 95                       | 62              | 95  | Kotoula et al., (2020)   |
| Raw wastewater                 | 7d Mixotrophic batch              | <i>Chlorella sorokiniana</i>                      | 0.184              | $\text{g L}^{-1}$ |                                                |                 |                |      | 89                       | 76              | 93  |                          |
| Synthetic raw wastewater (SRW) | 96h Mixotrophic batch             | <i>Chlorella vulgaris</i> - <i>Rhizobium sp</i>   | $0.85 \pm 0.01$    | $\text{g L}^{-1}$ | $0.114 \pm 0.007$ (A); $0.079 \pm 0.001$ (B) b | $\text{h}^{-1}$ |                |      |                          | $55.9 \pm 0.4$  | 100 | Ferro et al., (2019)     |
| Synthetic raw wastewater (SRW) | 96h Eterotrophic batch            | <i>Chlorella vulgaris</i> - <i>Rhizobium sp</i>   | $0.19 \pm 0.01$    | $\text{g L}^{-1}$ | $0.020 \pm 0.003$ (A); $0.027 \pm 0.004$ (B)   | $\text{h}^{-1}$ |                |      |                          | $58.8 \pm 3.1$  | 100 |                          |
| Raw wastewater                 | 13d 25 °C, continuous light       | <i>Chlorella vulgaris</i>                         | 1.15               | $\text{g L}^{-1}$ |                                                |                 |                |      |                          | 98              | 100 | Ferro et al., (2018)     |
| Raw wastewater                 | 13d 25 °C, continuous light       | <i>Scenedesmus sp</i>                             | 1.24               | $\text{g L}^{-1}$ |                                                |                 |                |      |                          | 96              | 100 |                          |
| Raw wastewater                 | 13d 25 °C, continuous light       | <i>Desmodesmus sp</i>                             | 0.87               | $\text{g L}^{-1}$ |                                                |                 |                |      |                          | 97              | 100 |                          |
| Raw wastewater                 | 13d 25 °C, continuous light       | <i>Senedesmus. obliquus</i>                       | 1.36               | $\text{g L}^{-1}$ |                                                |                 |                |      |                          | 95              | 100 |                          |
| Raw wastewater                 | untreated batch                   | <i>Chlorella protothecoides</i>                   |                    |                   | $0.76 \pm 0.07$                                | $\text{d}^{-1}$ |                |      | $61.5 \pm 1.3$           | $52.0 \pm 1.3$  | 100 | Sforza E. et al., (2018) |
| Raw wastewater                 | sterilized batch                  | <i>Chlorella protothecoides</i>                   |                    |                   | $0.78 \pm 0.08$                                | $\text{d}^{-1}$ |                |      | $55.5 \pm 1.3$           | $63.6 \pm 10$   | 100 |                          |
| Raw wastewater                 | sterilized batch                  | <i>Chlorella protothecoides</i> + <i>bacteria</i> |                    |                   | $0.76 \pm 0.09$                                | $\text{d}^{-1}$ |                |      | $57.4 \pm 1.3$           | $46.7 \pm 8.6$  | 100 |                          |
| Raw wastewater                 | sterilized batch CO2: air 5% v: v | <i>Chlorella protothecoides</i>                   |                    |                   | $0.96 \pm 0.09$                                | $\text{d}^{-1}$ |                |      | $52.9 \pm 1.3$           | $86.2 \pm 0.67$ | 100 |                          |

|                |                                                                   |                                                                     |             |                   |  |  |               |                                       |       |       |         |                              |
|----------------|-------------------------------------------------------------------|---------------------------------------------------------------------|-------------|-------------------|--|--|---------------|---------------------------------------|-------|-------|---------|------------------------------|
| Raw wastewater | 10d batch (L20-low nutrient load constant the light intensity)    | <i>Chlorella/Scenedesmus/Cyanobacteria</i>                          | 0.211±0.018 | g L <sup>-1</sup> |  |  | 0.0396±0.0014 | g L <sup>-1</sup> d <sup>-1</sup>     |       |       | 100     | Iasimone et al., (2018)      |
| Raw wastewater | 10d batch (M20-medium nutrient load constant the light intensity) | <i>Chlorella/Scenedesmus/Cyanobacteria</i>                          | 0.187±0.013 | g L <sup>-1</sup> |  |  | 0.0280±0.0018 | g L <sup>-1</sup> d <sup>-1</sup>     |       |       | 100     |                              |
| Raw wastewater | 10d batch (H20-high nutrient load constant the light intensity)   | <i>Chlorella/Scenedesmus/Cyanobacteria</i>                          | 0.159±0.021 | g L <sup>-1</sup> |  |  | 0.0185±0.0007 | g L <sup>-1</sup> d <sup>-1</sup>     |       |       | 100     |                              |
| Raw wastewater | 10d batch (L20-low nutrient load varying the light intensity)     | <i>Chlorella/Scenedesmus/Cyanobacteria</i>                          | 0.211±0.018 | g L <sup>-1</sup> |  |  | 0.0396±0.0014 | g L <sup>-1</sup> d <sup>-1</sup>     |       |       | 100     |                              |
| Raw wastewater | 10d batch (L50-low nutrient load varying the light intensity)     | <i>Chlorella/Scenedesmus/Cyanobacteria</i>                          | 0.219±0.019 | g L <sup>-1</sup> |  |  | 0.0504±0.0016 | g L <sup>-1</sup> d <sup>-1</sup>     |       |       | 100     |                              |
| Raw wastewater | 10d batch (L100-low nutrient load varying the light intensity)    | <i>Chlorella/Scenedesmus/Cyanobacteria</i>                          | 0.227±0.016 | g L <sup>-1</sup> |  |  | 0.0587±0.0023 | g L <sup>-1</sup> d <sup>-1</sup>     |       |       | 100     |                              |
| Raw wastewater | 206d HRAP-noPT                                                    | <i>Chlorella&gt;Stigeoclonium</i>                                   |             |                   |  |  | 20 ± 7        | g VSS m <sup>-2</sup> d <sup>-1</sup> | 65±23 | 48±16 | 25 ± 52 | Arashiro L.T. et al., (2019) |
| Raw wastewater | 14d batch                                                         | <i>Chlorella/Scenedesmus combined with yeast Lipomyces starkeyi</i> |             |                   |  |  | 0.031         | g m <sup>-2</sup> d <sup>-1</sup>     |       | 100   | 100     | Iasimone et al., (2018)      |
