# Supplementary material
Source: MDPI journal article supplement (https://www.mdpi.com/2076-3298/8/12/136)
Supplement: s1 [file s1]

Table S3. Biomass production ( $\text{g L}^{-1}$ ), maximum specific growth rate ( $\text{d}^{-1}$ ), productivities ( $\text{g L}^{-1} \text{d}^{-1}$ ) and bioremediation expressed as removal of COD, N and P in the cultivation of microalgae on secondary wastewater.

| Type of water        | Conditions                                      | Microalgae/Microalgae in symbiosis         | Biomass production | Unit                 | Maximum specific growth rate | Time Unit       | Productivities | Unit                               | Bioremediation removal % |     | Reference                        |
|----------------------|-------------------------------------------------|--------------------------------------------|--------------------|----------------------|------------------------------|-----------------|----------------|------------------------------------|--------------------------|-----|----------------------------------|
|                      |                                                 |                                            |                    |                      |                              |                 |                |                                    | N                        | P   |                                  |
| Secondary wastewater | batch                                           | <i>Chlorella minutissima-Chlorella sp.</i> | 0.96               | $\text{g SS L}^{-1}$ |                              |                 | 0.10           | $\text{g SS L}^{-1} \text{d}^{-1}$ |                          |     | Mennaa et al., (2019)            |
| Secondary wastewater | Period I (217-385 h) (CO <sub>2</sub> )         | <i>Chlorella minutissima-Chlorella sp.</i> | $0.406 \pm 0.002$  | $\text{g SS L}^{-1}$ |                              |                 | 0.11           | $\text{g SS L}^{-1} \text{d}^{-1}$ | 99                       | 99  |                                  |
| Secondary wastewater | Period II (385–721 h) (CO <sub>2</sub> -Free)   | <i>Chlorella minutissima-Chlorella sp.</i> | 0.226              | $\text{g SS L}^{-1}$ |                              |                 | 0.06           | $\text{g SS L}^{-1} \text{d}^{-1}$ | 59                       | 98  |                                  |
| Secondary wastewater | Period III (721 and the end) (CO <sub>2</sub> ) | <i>Chlorella minutissima-Chlorella sp.</i> | 0.364              | $\text{g SS L}^{-1}$ |                              |                 | 0.10           | $\text{g SS L}^{-1} \text{d}^{-1}$ | 99                       | 99  |                                  |
| Secondary wastewater | 600h batch                                      | <i>Chlorella vulgaris</i>                  | 0.47               | $\text{g L}^{-1}$    | 1.36                         | $\text{d}^{-1}$ | 0.107          | $\text{g L}^{-1} \text{d}^{-1}$    | 95                       | 100 | Álvarez-Díaz P.D. et al., (2017) |
| Secondary wastewater | 600h batch                                      | <i>Chlorella kessleri</i>                  | 0.38               | $\text{g L}^{-1}$    | 1.59                         | $\text{d}^{-1}$ | 0.071          | $\text{g L}^{-1} \text{d}^{-1}$    | 95                       | 100 |                                  |
| Secondary wastewater | 600h batch                                      | <i>Chlorella sorokiniana</i>               | 0.74               | $\text{g L}^{-1}$    | 0.59                         | $\text{d}^{-1}$ | 0.076          | $\text{g L}^{-1} \text{d}^{-1}$    | 94                       | 100 |                                  |
| Secondary wastewater | 600h batch                                      | <i>Botryococcus braunii</i>                | 1.09               | $\text{g L}^{-1}$    | 0.51                         | $\text{d}^{-1}$ | 0.057          | $\text{g L}^{-1} \text{d}^{-1}$    | 86                       | 100 |                                  |
| Secondary wastewater | 600h batch                                      | <i>Neochloris oleabundans</i>              | 0.25               | $\text{g L}^{-1}$    | 0.17                         | $\text{d}^{-1}$ | 0.008          | $\text{g L}^{-1} \text{d}^{-1}$    | 57                       | 100 |                                  |
| Secondary wastewater | 600h batch                                      | <i>Scenedesmus obliquus</i>                | 1.42               | $\text{g L}^{-1}$    | 0.30                         | $\text{d}^{-1}$ | 0.081          | $\text{g L}^{-1} \text{d}^{-1}$    | 96                       | 100 |                                  |
| Secondary wastewater | 600h batch                                      | <i>Ankistrodesmus falcatus</i>             | 0.59               | $\text{g L}^{-1}$    |                              |                 | 0.048          | $\text{g L}^{-1} \text{d}^{-1}$    | 89                       | 100 |                                  |
| Secondary wastewater | 240h batch with 5% di CO <sub>2</sub>           | <i>Chlorella vulgaris</i>                  | $1.3 \pm 0.270$    | $\text{g L}^{-1}$    | $0.480 \pm 0.144$            | $\text{d}^{-1}$ | 0.112          | $\text{g L}^{-1} \text{d}^{-1}$    | >90                      | >98 | Arbib Z. et al., (2014)          |
| Secondary wastewater | 240h batch with 5% di CO <sub>2</sub>           | <i>Chlorella kessleri</i>                  | $1.1 \pm 0.110$    | $\text{g L}^{-1}$    | $0.624 \pm 0.168$            | $\text{d}^{-1}$ | 0.111          | $\text{g L}^{-1} \text{d}^{-1}$    | >90                      | >98 |                                  |
| Secondary wastewater | 240h batch with 5% di CO <sub>2</sub>           | <i>Scenedesmus obliquus</i>                | $1.6 \pm 0.105$    | $\text{g L}^{-1}$    | $0.672 \pm 0.168$            | $\text{d}^{-1}$ | 0.152          | $\text{g L}^{-1} \text{d}^{-1}$    | >90                      | >98 |                                  |
| Secondary wastewater | 240h batch with 5% di CO <sub>2</sub>           | <i>Natural Bloom</i>                       | $1.8 \pm 0.161$    | $\text{g L}^{-1}$    | $0.600 \pm 0.144$            | $\text{d}^{-1}$ | 0.167          | $\text{g L}^{-1} \text{d}^{-1}$    | >90                      | >98 |                                  |
| Secondary wastewater | batch WW                                        | <i>Chlorella vulgaris</i>                  | $0.66 \pm 0.015$   | $\text{g L}^{-1}$    | $0.83 \pm 0.09$              | $\text{d}^{-1}$ | 0.10           | $\text{g SS L}^{-1} \text{d}^{-1}$ | 99                       | 80  | Ruiz J. Et al., (2013)           |
| Secondary wastewater | batch WW + NP                                   | <i>Chlorella vulgaris</i>                  | $1.08 \pm 0.019$   | $\text{g SS L}^{-1}$ | $0.79 \pm 0.07$              | $\text{d}^{-1}$ | 0.15           | $\text{g SS L}^{-1} \text{d}^{-1}$ | 99                       | 96  |                                  |
| Secondary wastewater | batch WW + NP + M                               | <i>Chlorella vulgaris</i>                  | $1.06 \pm 0.026$   | $\text{g SS L}^{-1}$ | $0.78 \pm 0.08$              | $\text{d}^{-1}$ | 0.15           | $\text{g SS L}^{-1} \text{d}^{-1}$ | 99                       | 96  |                                  |
| Secondary wastewater | operated in continuous HRT 0,5 d                | <i>Scenedesmus obliquus</i>                | $0 \pm 0$          | $\text{g SS L}^{-1}$ |                              |                 | $0 \pm 0$      | $\text{g SS L}^{-1} \text{d}^{-1}$ | 0                        | 0   | Ruiz J. Et al., (2013)           |

|                      |                                  |                             |            |                      |      |                 |           |                                      |    |       |                              |
|----------------------|----------------------------------|-----------------------------|------------|----------------------|------|-----------------|-----------|--------------------------------------|----|-------|------------------------------|
| Secondary wastewater | operated in continuous HRT 1,1 d | <i>Scenedesmus obliquus</i> | 0.38±0.013 | g SS L <sup>-1</sup> |      |                 | 0.35±0.01 | g SS L <sup>-1</sup> d <sup>-1</sup> | 89 | 95    |                              |
| Secondary wastewater | operated in continuous HRT 1,7 d | <i>Scenedesmus obliquus</i> | 0.61±0.033 | g SS L <sup>-1</sup> |      |                 | 0.36±0.02 | g SS L <sup>-1</sup> d <sup>-1</sup> | 91 | 97    |                              |
| Secondary wastewater | operated in continuous HRT 2,3 d | <i>Scenedesmus obliquus</i> | 0.63±0.066 | g SS L <sup>-1</sup> |      |                 | 0.28±0.03 | g SS L <sup>-1</sup> d <sup>-1</sup> | 89 | 90    |                              |
| Secondary wastewater | operated in continuous HRT 2,8 d | <i>Scenedesmus obliquus</i> | 1.05±0.069 | g SS L <sup>-1</sup> |      |                 | 0.38±0.02 | g SS L <sup>-1</sup> d <sup>-1</sup> | 87 | 98    |                              |
| Secondary wastewater | operated in continuous HRT 3,4 d | <i>Scenedesmus obliquus</i> | 0.98±0.040 | g SS L <sup>-1</sup> |      |                 | 0.29±0.01 | g SS L <sup>-1</sup> d <sup>-1</sup> | 81 | 95    |                              |
| Secondary wastewater | indoor photobioreactor           | <i>Scenedesmus</i> 80%      |            |                      | 0.39 | d <sup>-1</sup> |           |                                      | 99 | 99    | Di Termini I. et al., (2011) |
| Secondary wastewater | outdoor photobioreactor          | <i>Scenedesmus</i> 70%      |            |                      | 0.02 | d <sup>-1</sup> |           |                                      | 90 | 80-90 |                              |
